# Supplementary material
Source: publisher figshare collection journal article supplement (https://tandf.figshare.com/articles/dataset/_/9933617)
Supplement: Supplementary file 1 [file 1]

## Supplementary Materials

### Supplement 1

#### Modern training sets:

Modern training sets are based on annual leaf collections in September of each successive year since 1996. Meteorological data and phenological observations allow a direct correlation between *B. nana* UI and the GDD<sub>5</sub> of the main growing season calculated as May through September. Phenological bud-burst date is defined as first day of visible green leaf laminae and has a maximum observational error of  $\pm 2$  days (pers. com. Elina Vainio, Kevo Subarctic Research Station). For the validation of correspondence between modern and fossil UI data, the GDD<sub>5</sub> data set is supplemented with *B. nana* leaves from high resolution dated young peat deposits from Kevo bog at Kevo station<sup>22</sup>.

#### GDD<sub>5</sub> training set:

The analysis of the modern training set based on 28 years UI results for GDD<sub>5</sub> in the linear regression:  $UI = 1.037 + (0.000196 * GDD_5)$ ,  $r = 0.836$ ,  $r^2 = 0.699$ ,  $p < 0.001$

#### Bud-burst date training set:

The analysis of the modern training set based on 18 years UI results for bud burst dates (day of year) since 1996 in the linear regression:  $UI = 410.072 - (216.260 * BB)$ ,  $r = 0.826$ ,  $r^2 = 0.681$ ,  $p < 0.001$

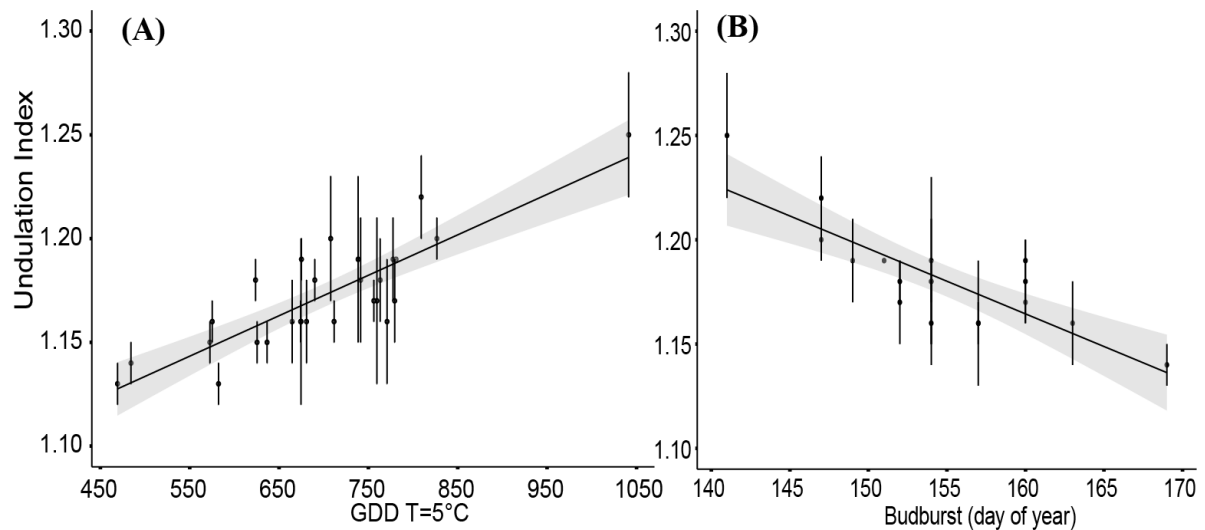

**Fig S1 Modern training sets for GDD5 and budburst dates.** A) Growing degree days ranging from 450 – 1050 GDD<sub>5</sub> measured during the period from 1976 to 2015 at Kevo Subarctic Station plotted against measured UI of *B. nana* leaves from annual leaf collection at Kevo phenological station and *B. nana* leaf remains from a well-dated young peat section at Kevo bog<sup>22</sup>. B) Bud-burst dates (day of year) ranging from 141 – 169 observed during the period from 1996 to 2015 of phenological monitoring at Kevo Subarctic Station plotted against measured UI of *B. nana* leaves from annual leaf collection at Kevo phenological station.

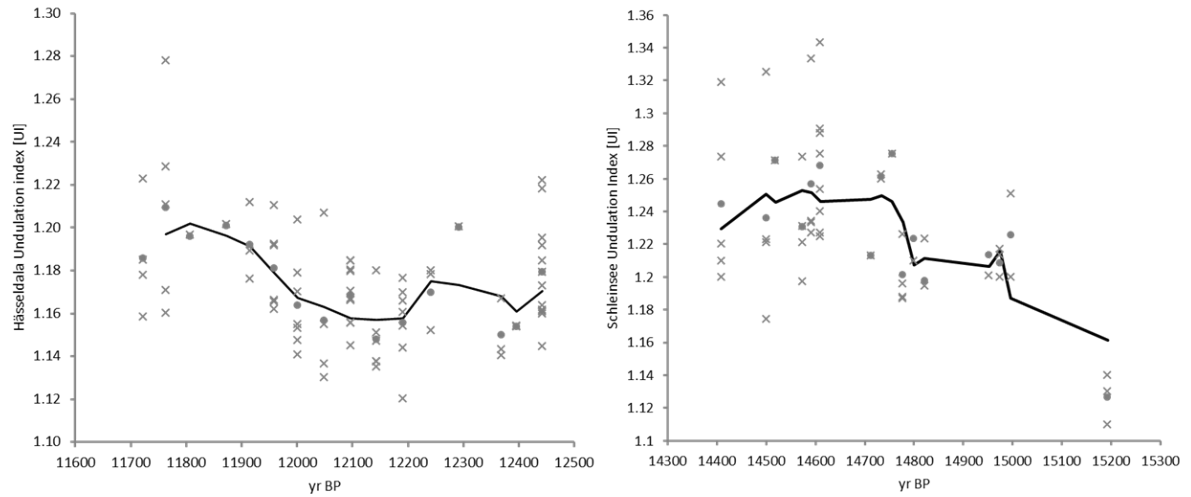

**Fig. S2. UI raw data from the studied intervals of the a) Hässeldala (HÄ) and b) Schleinsee (SCH).** Crosses are UI determinations from individual leaf fragments per sampled horizon, dots are averages per sampled horizon, black lines are 3-point moving averages from which GDD<sub>5</sub> and bud-burst dates are derived.
